# Supplementary material
Source: MDPI journal article supplement (https://www.mdpi.com/2073-4395/12/11/2887)
Supplement: s1 [file s1]

**Supplementary materials to the manuscript**

# Figures

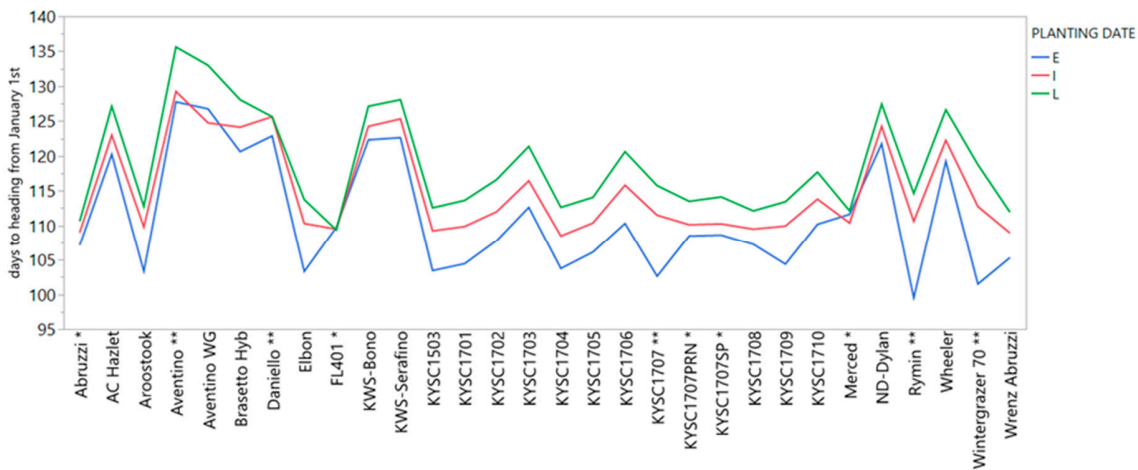

**Figure S1.** Mean number of days to heading for each rye variety of all environments over planting dates. E – Early Planting Date, I – Intermediate, L – Late; \*varieties tested in 2018/2019 season only; \*\*varieties tested in 2019/2020 season only.

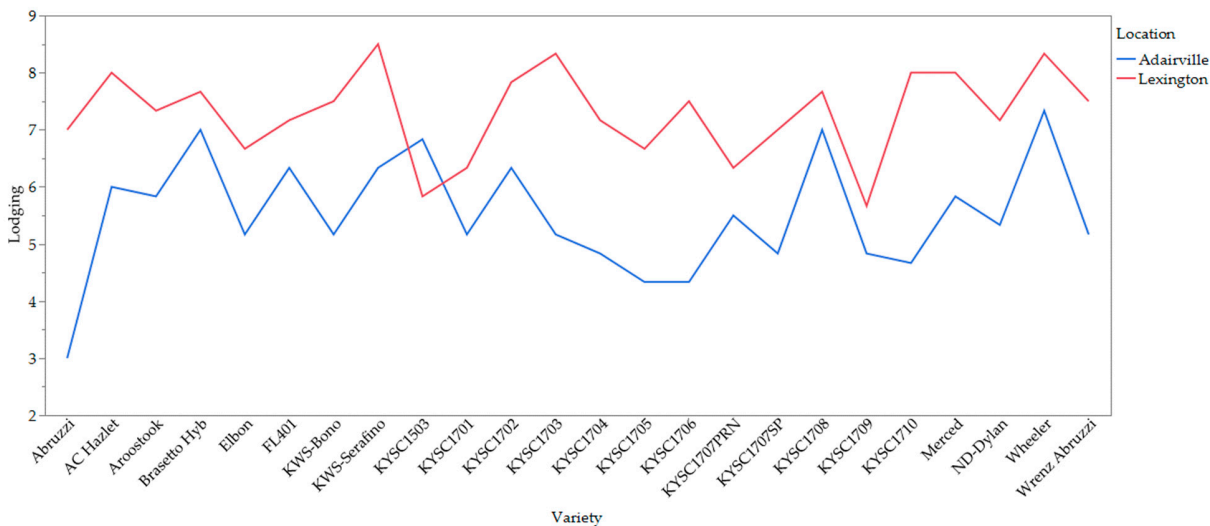

**Figure S2.** Lodging resistance of rye varieties tested in 2019 over all planting dates, by location.

a

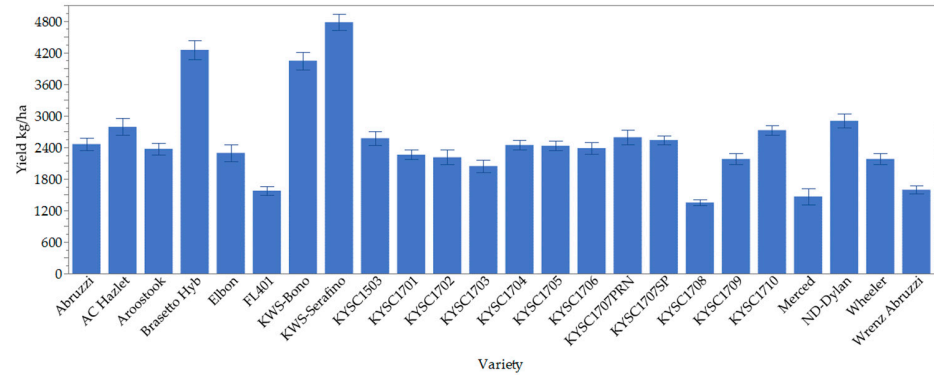

b

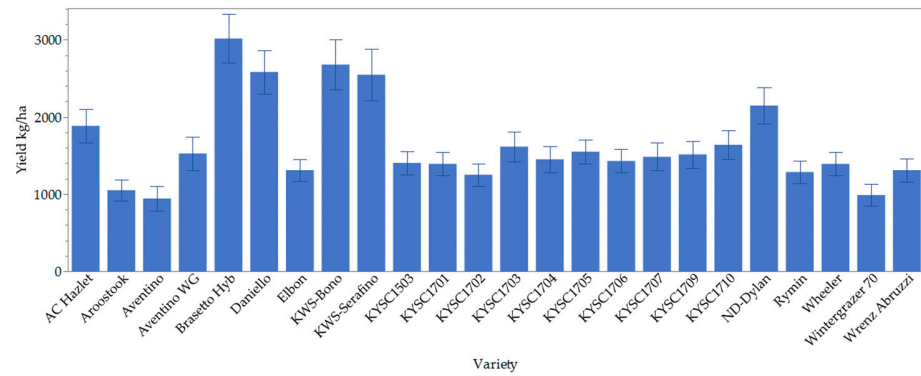

**Figure S3.** Mean yield of rye varieties harvested in (a) 2019, and (b) 2020.

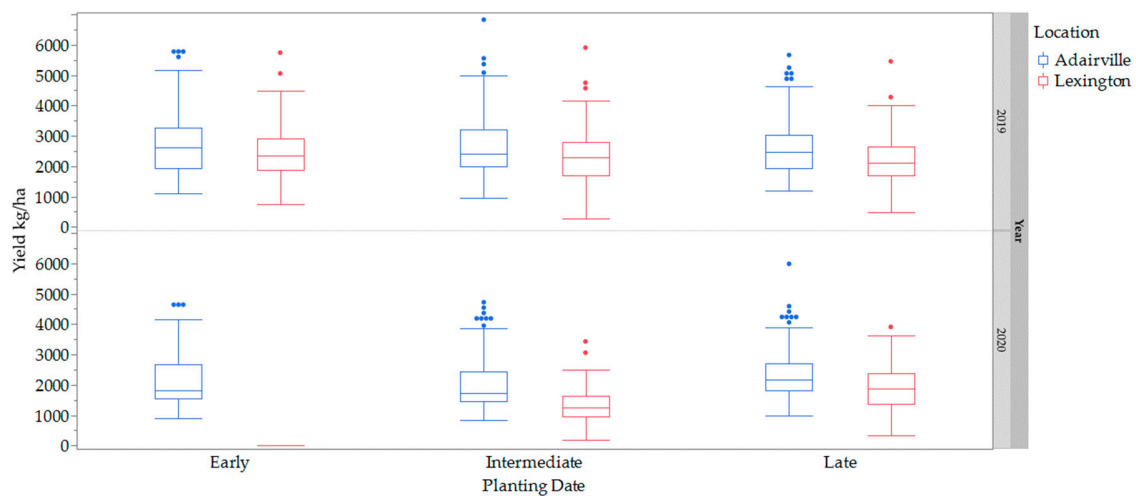

**Figure S4.** Mean yield of rye varieties planted in three dates in two locations in 2019 and 2020.

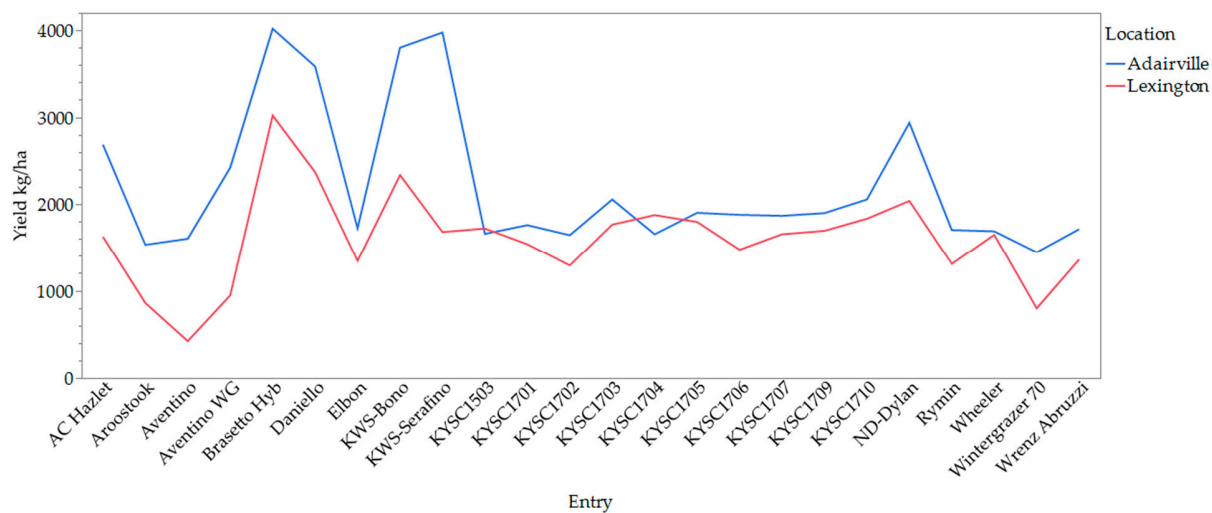

**Figure S5.** Mean yield of rye varieties tested in 2020 at two locations.

# Tables

**Table S1.** Significance of F-test for Fusarium head blight, Septoria leaf blotch and lodging resistance.

|                             | Fusarium Head<br>Blight | Septoria Leaf<br>Blotch | Lodging    |
|-----------------------------|-------------------------|-------------------------|------------|
| <b>Overall</b>              |                         |                         |            |
| Environment                 | 0.69 ns                 | 0.0001 ***              | <.0001 *** |
| Variety                     | <.0001 ***              | <.0001 ***              | <.0001 *** |
| Planting Date               | <.0001 ***              | 0.37 ns                 | 0.0004 *** |
| Environment × Variety       | 0.01 **                 | 0.11 ns                 | <.0001 *** |
| Environment × Planting Date | <.0001 ***              | 0.66 ns                 | 0.005 **   |
| Variety × Planting Date     | <.0001 ***              | 0.88 ns                 | 0.51 ns    |
| <b>2019</b>                 |                         |                         |            |
| Location                    | 0.13 ns                 | <.0001 ***              | <.0001 *** |
| Variety                     | <.0001 ***              | <.0001 ***              | <.0001 *** |
| Planting Date               | <.0001 ***              | 0.0006 ***              | <.0001 *** |
| Location × Variety          | 0.21 ns                 | <.0001 ***              | <.0001 *** |
| Location × Planting Date    | <.0001 ***              | 0.002 ***               | <.0001 *** |
| Variety × Planting Date     | 0.23 ns                 | 0.30 ns                 | 0.0001 *** |
| <b>2020</b>                 |                         |                         |            |
| Location                    | 0.004 **                | 0.02 *                  | <.0001 *** |
| Variety                     | <.0001 ***              | <.0001 ***              | <.0001 *** |
| Planting Date               | <.0001 ***              | 0.002 **                | 0.002 **   |
| Location × Variety          | <.0001 ***              | 0.0002 ***              | <.0001 *** |
| Location × Planting Date    | <.0001 ***              | 0.07 ns                 | 0.002 **   |
| Variety × Planting Date     | <.0001 ***              | 0.14 ns                 | 0.36 ns    |
| <b>Adairville</b>           |                         |                         |            |
| Year <sup>(1)</sup>         | 0.0025 **               | <.0001 ***              | <.0001 *** |
| Variety                     | <.0001 ***              | <.0001 ***              | <.0001 *** |
| Planting Date               | <.0001 ***              | <.0001 ***              | <.0001 *** |
| Year × Variety              | <.0001 ***              | <.0001 ***              | <.0001 *** |
| Year × Planting Date        | <.0001 ***              | 0.11 ns                 | <.0001 *** |
| Variety × Planting Date     | 0.24 ns                 | 0.41 ns                 | 0.01 **    |
| <b>Lexington</b>            |                         |                         |            |
| Year <sup>(1)</sup>         | <.0001 ***              | <.0001 ***              | <.0001 **  |
| Variety                     | <.0001 ***              | <.0001 ***              | <.0001 *** |
| Planting Date               | <.0001 ***              | 0.37 ns                 | 0.28 ns    |
| Year × Variety              | 0.35 ns                 | 0.01 *                  | <.0001 *** |
| Year × Planting Date        | <.0001 ***              | 0.03 *                  | 0.97 ns    |
| Variety × Planting Date     | 0.004 **                | 0.18 ns                 | 0.2 ns     |

Note. \*, p≤0.05; \*\*, p≤0.01; \*\*\*, p≤0.001; ns, non-significant.

(1) Based on One way ANOVA by location

**Table S2.** Analysis of variance of rye yield at three planting dates and two locations, 2019 and 2020.

|                         | Df  | Sum Sq | Mean Sq | F value | Pr(>F)       |
|-------------------------|-----|--------|---------|---------|--------------|
| <b>2019</b>             |     |        |         |         |              |
| LOC                     | 1   | 4200   | 4200    | 58.739  | 1.01e-13 *** |
| GENOTYPE                | 23  | 95585  | 4156    | 58.121  | <2e-16 ***   |
| Planting Date           | 2   | 692    | 346     | 4.840   | 0.008 **     |
| LOC: GENOTYPE           | 23  | 6532   | 284     | 3.972   | 4.15e-09 *** |
| GENOTYPE: Planting Date | 46  | 5762   | 125     | 1.752   | 0.002 **     |
| LOC: Planting Date      | 2   | 102    | 51      | 0.713   | 0.49 ns      |
| Residuals               | 478 | 34179  | 72      |         |              |
| <b>2020</b>             |     |        |         |         |              |
| LOC                     | 1   | 11164  | 11164   | 208.484 | < 2e-16 ***  |
| GENOTYPE                | 23  | 51852  | 2254    | 42.100  | < 2e-16 ***  |
| Planting Date           | 2   | 4247   | 2124    | 39.659  | 2.22e-16 *** |
| LOC: GENOTYPE           | 23  | 9981   | 434     | 8.104   | < 2e-16 ***  |
| GENOTYPE: Planting Date | 46  | 2632   | 57      | 1.068   | 0.36 ns      |
| LOC: Planting Date      | 1   | 626    | 626     | 11.698  | 0.000693 *** |
| Residuals               | 383 | 20509  | 54      |         |              |

Note. \*,  $p \leq 0.05$ ; \*\*,  $p \leq 0.01$ ; \*\*\*,  $p \leq 0.001$ ; ns, non-significant.

**Table S3.** Rye variety mean yield (kg ha<sup>-1</sup>) in each planting date over all environments, 2019-2020.

| Variety         | Early            | Intermediate     | Late           |
|-----------------|------------------|------------------|----------------|
| Abruzzi         | 2481.1 ± 283.9   | 2355.9 ± 187     | 2545.1 ± 168.4 |
| AC Hazlet       | 2190.7 ± 347.4   | 2594.6 ± 258.2   | 2227.5 ± 115.5 |
| Aroostook       | 1708.7 ± 322.4   | 1661.8 ± 176.4   | 1762.3 ± 153.3 |
| Aventino        | 875.2 ± 351.6    | 1027.6 ± 324.4   | 924.1 ± 161.7  |
| Aventino WG     | 1311.1 ± 504.6   | 1448.5 ± 264.7   | 1819.1 ± 325.7 |
| Brasetto Hyb    | 3240.4 ± 506.3   | 3970.8 ± 283.4   | 3691.8 ± 172.8 |
| Daniello        | 1753.1 ± 675.2   | 2689.4 ± 308.1   | 3305.5 ± 267.5 |
| Elbon           | 1898.3 ± 337.5   | 1715.3 ± 134.7   | 1791.1 ± 153.9 |
| FL401           | 1286.4 ± 64.8    | 1591.8 ± 124.9   | 1846.3 ± 135.4 |
| KWS-Bono        | 2892.9 ± 457.7   | 3472.3 ± 269.8   | 3722.6 ± 298.2 |
| KWS-Serafino    | 3584.2 ± 557.8   | 3799.8 ± 392.8   | 3603.5 ± 304.8 |
| KYSC1503        | 1785.2 ± 322.9   | 2091.1 ± 182.2   | 2085.4 ± 148.6 |
| KYSC1701        | 1633.1 ± 266.5   | 1803.5 ± 158     | 2040.1 ± 70    |
| KYSC1702        | 1475.5 ± 249.9   | 1836.3 ± 227.9   | 1880.2 ± 135.9 |
| KYSC1703        | 1524.9 ± 264.5   | 1911.9 ± 171     | 2053.1 ± 146.9 |
| KYSC1704        | 1528.4 ± 248.3   | 1883.2 ± 165     | 2433.7 ± 122.9 |
| KYSC1705        | 1769.7 ± 290.7   | 1935.3 ± 118.7   | 2266.3 ± 96.1  |
| KYSC1706        | 1824.7 ± 315.7   | 1778.1 ± 95.8    | 2121.5 ± 128.1 |
| KYSC1707        | 832.6 ± 324.5    | 1383.7 ± 189.3   | 2239.3 ± 171.5 |
| KYSC1707PRN     | 2618 ± 131       | 2892.3 ± 309.6   | 2264.7 ± 188.3 |
| KYSC1707SP      | 2435.2 ± 103.6   | 2448.7 ± 94.9    | 2727.5 ± 215.2 |
| KYSC1708        | 1445.4 ± 106.8   | 1303.1 ± 71.1    | 1298.7 ± 87.9  |
| KYSC1709        | 1517.1 ± 262.1   | 1825.5 ± 124     | 2197 ± 128.3   |
| KYSC1710        | 1910.9 ± 314.9   | 2213.8 ± 184.6   | 2423.1 ± 126.9 |
| Merced          | 1206.7 ± 147.8   | 1366.2 ± 287.6   | 1824.8 ± 318.5 |
| ND-Dylan        | 2260 ± 358.3     | 2684.4 ± 186.7   | 2630.4 ± 154.3 |
| Rymin           | 797 ± 321.3      | 1380.3 ± 183.4   | 1685.4 ± 145.9 |
| Wheeler         | 1555.3 ± 257.2   | 1857.3 ± 129.8   | 1947.7 ± 141.5 |
| Wintergrazer 70 | 794.5 ± 305.3    | 846.1 ± 195.3    | 1323.6 ± 228.8 |
| Wrenz Abruzzi   | 1084.15 ± 167.92 | 1456.45 ± 107.25 | 1812.3 ± 99.5  |

**Table S4.** Rye variety mean of number of tillers (m<sup>-2</sup>), 2019.

| Variety                       | Overall      | Early        | Intermediate | Late         |
|-------------------------------|--------------|--------------|--------------|--------------|
| Abruzzi                       | 885 ± 27.3   | 949 ± 36.9   | 868.3 ± 45   | 837.8 ± 51.4 |
| AC Hazlet                     | 491 ± 31.8   | 567.8 ± 34.7 | 513.1 ± 61.5 | 392 ± 27.6   |
| Aroostook                     | 609.4 ± 31.4 | 704.1 ± 52.8 | 562.4 ± 20.6 | 561.5 ± 56.2 |
| Brasetto Hyb                  | 583.7 ± 19.6 | 626.1 ± 27.4 | 579.5 ± 35.2 | 545.4 ± 33.9 |
| Elbon                         | 414.4 ± 41.9 | 582.1 ± 51.2 | 338.1 ± 20.8 | 322.9 ± 46.9 |
| FL401                         | 507.1 ± 41.8 | 538.2 ± 87.6 | 503.2 ± 76.1 | 479.9 ± 71.7 |
| KWS-Bono                      | 621 ± 25.8   | 656.6 ± 65.9 | 585.7 ± 12.6 | 620.8 ± 44.8 |
| KWS-Serafino                  | 527.7 ± 8.6  | 523.9 ± 14   | 549.9 ± 9.2  | 509.5 ± 15.8 |
| KYSC1503                      | 775.6 ± 26.5 | 765.2 ± 50.3 | 837.8 ± 22.6 | 723.9 ± 49.9 |
| KYSC1701                      | 578.3 ± 29.5 | 669.2 ± 57.7 | 576.8 ± 7.2  | 488.8 ± 27.7 |
| KYSC1702                      | 517.6 ± 35.8 | 628.8 ± 54.7 | 495.1 ± 30.3 | 428.8 ± 56.9 |
| KYSC1703                      | 499.6 ± 22.5 | 557.1 ± 53   | 499.6 ± 15.2 | 442.2 ± 18   |
| KYSC1704                      | 567.2 ± 16.5 | 593.8 ± 41.6 | 580.4 ± 19.2 | 527.4 ± 7.6  |
| KYSC1705                      | 630.3 ± 18.7 | 687.1 ± 24.7 | 612.7 ± 36.5 | 591.1 ± 14.8 |
| KYSC1706                      | 558.5 ± 20.2 | 592 ± 53.7   | 574.1 ± 11.1 | 509.5 ± 14.9 |
| KYSC1707PRN                   | 621.3 ± 27.9 | 645.8 ± 73.5 | 626.1 ± 35.6 | 592 ± 37.4   |
| KYSC1707SP                    | 566 ± 31.2   | 613.6 ± 85.7 | 544.5 ± 30.1 | 540 ± 36.4   |
| KYSC1708                      | 460.8 ± 23.6 | 526.5 ± 28.8 | 479 ± 26.1   | 376.7 ± 26.9 |
| KYSC1709                      | 617.7 ± 12.5 | 594.7 ± 15.1 | 635.1 ± 18   | 623.4 ± 29.5 |
| KYSC1710                      | 571.7 ± 16.6 | 610.9 ± 29.8 | 553.4 ± 35.7 | 550.8 ± 10.4 |
| Merced                        | 366 ± 26.8   | 407.2 ± 57.7 | 329.2 ± 53.8 | 361.5 ± 25.8 |
| ND-Dylan                      | 534.9 ± 22.9 | 612.7 ± 15   | 525.6 ± 32.9 | 466.4 ± 29.5 |
| Wheeler                       | 465.2 ± 16.2 | 455.7 ± 27.2 | 487.1 ± 28   | 453 ± 33.7   |
| Wrenz Abruzzi                 | 397.7 ± 21.7 | 400.1 ± 37.9 | 378.5 ± 38.7 | 414.4 ± 45.2 |
| <b>Significance of Effect</b> |              |              |              |              |
| Planting Date                 | <.0001 ***   |              |              |              |
| Variety                       | <.0001 ***   |              |              |              |
| Planting Date × Variety       | 0.24 ns      |              |              |              |

Note. \*, p≤0.05; \*\*, p≤0.01; \*\*\*, p≤0.001; ns, non-significant.



**Table S5.** Correlation of DON content with other traits measured in Lexington, 2019.

| <b>Planting Date</b> | <b>Trait</b> | <b>Mean</b> | <b>Correlation</b> | <b>Lower 95%</b> | <b>Upper 95%</b> | <b>Sign Prob</b> | <b>Covariance</b> |
|----------------------|--------------|-------------|--------------------|------------------|------------------|------------------|-------------------|
| <b>E</b>             | Earliness    | 115.84      | 0.17               | -0.25            | 0.54             | 0.42             | 0.66              |
| <b>E</b>             | FHB index    | 5.41        | -0.02              | -0.42            | 0.39             | 0.93             | -0.01             |
| <b>E</b>             | Height [in]  | 62.75       | 0.51               | 0.13             | 0.76             | 0.01             | 2.09              |
| <b>E</b>             | Lodging      | 7.34        | 0.36               | -0.05            | 0.66             | 0.09             | 0.36              |
| <b>E</b>             | Yield kg/ha  | 2457.46     | -0.16              | -0.53            | 0.26             | 0.45             | -98.36            |
| <b>I</b>             | Earliness    | 118.74      | 0.25               | -0.17            | 0.60             | 0.23             | 1.56              |
| <b>I</b>             | FHB index    | 4.13        | 0.16               | -0.26            | 0.53             | 0.44             | 0.20              |
| <b>I</b>             | Height [in]  | 63.19       | 0.48               | 0.10             | 0.74             | 0.02             | 3.38              |
| <b>I</b>             | Lodging      | 7.24        | 0.30               | -0.12            | 0.63             | 0.16             | 0.51              |
| <b>I</b>             | Yield kg/ha  | 2362.20     | -0.20              | -0.56            | 0.22             | 0.34             | -234.14           |
| <b>L</b>             | Earliness    | 120.58      | 0.17               | -0.25            | 0.54             | 0.43             | 0.67              |
| <b>L</b>             | FHB index    | 5.83        | 0.21               | -0.21            | 0.56             | 0.33             | 0.18              |
| <b>L</b>             | Height [in]  | 64.39       | 0.27               | -0.15            | 0.60             | 0.21             | 1.32              |
| <b>L</b>             | Lodging      | 7.26        | 0.40               | 0.00             | 0.69             | 0.05             | 0.41              |
| <b>L</b>             | Yield kg/ha  | 2226.43     | -0.32              | -0.64            | 0.10             | 0.13             | -184.23           |

**Table S6.** Rye variety means of DON content of 24 varieties tested in an inoculated scab nursery, 2021.

| Variety           | Mean | Std Dev | Std Err Mean | Lower 95% | Upper 95% |
|-------------------|------|---------|--------------|-----------|-----------|
| KYSC1702          | 6.33 | 2.80    | 1.62         | -0.63     | 13.29     |
| KYSC1706          | 5.03 | 1.88    | 1.08         | 0.37      | 9.70      |
| KWS-Daniello      | 4.80 | 1.97    | 1.14         | -0.09     | 9.69      |
| KWS-Brasetto      | 4.43 | 2.41    | 1.39         | -1.56     | 10.43     |
| KYSC1707          | 3.83 | 1.99    | 1.15         | -1.10     | 8.77      |
| KYSC1710          | 3.77 | 0.35    | 0.20         | 2.89      | 4.64      |
| AC Hazlet         | 3.53 | 1.62    | 0.93         | -0.48     | 7.55      |
| KYSC1705          | 3.53 | 1.02    | 0.59         | 1.00      | 6.07      |
| ND-Dylan          | 3.50 | 1.06    | 0.61         | 0.87      | 6.13      |
| Elbon             | 3.40 | 0.75    | 0.44         | 1.52      | 5.28      |
| KYSC1710 selected | 3.37 | 0.21    | 0.12         | 2.85      | 3.88      |
| KYSC1709          | 3.23 | 0.57    | 0.33         | 1.82      | 4.65      |
| Rymin             | 3.20 | 1.41    | 0.81         | -0.30     | 6.70      |
| Wheeler           | 3.13 | 1.17    | 0.68         | 0.22      | 6.04      |
| KYSC1704          | 3.08 | 2.01    | 1.16         | -1.91     | 8.07      |
| KYSC1701          | 3.07 | 0.21    | 0.12         | 2.55      | 3.58      |
| KYSC1703          | 3.03 | 1.46    | 0.84         | -0.59     | 6.65      |
| KYSC1503          | 3.00 | 1.30    | 0.75         | -0.23     | 6.23      |
| KWS-Bono          | 2.90 | 0.96    | 0.56         | 0.50      | 5.30      |
| KWS-Serafino      | 2.70 | 1.14    | 0.66         | -0.12     | 5.52      |
| Wintergrazer 70   | 2.50 | 1.59    | 0.92         | -1.44     | 6.44      |
| Aroostook         | 2.43 | 1.36    | 0.78         | -0.94     | 5.81      |
| Aventino WG       | 2.30 | 1.14    | 0.66         | -0.52     | 5.12      |
| Wrenz Abruzzi     | 1.97 | 1.35    | 0.78         | -1.39     | 5.34      |

  

| Source   | DF    | Sum of Squares | Mean Square | F Ratio |
|----------|-------|----------------|-------------|---------|
| name     | 23.00 | 63.11          | 2.74        | 1.27 ns |
| Error    | 48.00 | 103.64         | 2.16        |         |
| C. Total | 71.00 | 166.76         |             |         |

Note. \*,  $p \leq 0.05$ ; \*\*,  $p \leq 0.01$ ; \*\*\*,  $p \leq 0.001$ ; ns, non-significant.

**Table S7.** Correlations of variety FHB index mean for varieties tested in 2019 and 2020 planting date plots and 2020 and 2021 Scab Nursery.

|                               | <b>2021 SN</b> | <b>2020 and<br/>2021 SN</b> | <b>2020 SN</b> | <b>2019 plots</b> | <b>2020 plots</b> | <b>2019 plots<br/>(Lexington)</b> | <b>2020 plots<br/>(Lexington)</b> |
|-------------------------------|----------------|-----------------------------|----------------|-------------------|-------------------|-----------------------------------|-----------------------------------|
| <b>2021 SN</b>                | 1.00           | 0.85                        | 0.59           | 0.70              | 0.77              | 0.59                              | 0.70                              |
| <b>2020 and 2021 SN</b>       | 0.85           | 1.00                        | 0.92           | 0.59              | 0.68              | 0.50                              | 0.61                              |
| <b>2020 SN</b>                | 0.59           | 0.92                        | 1.00           | 0.42              | 0.58              | 0.36                              | 0.52                              |
| <b>2019 plots</b>             | 0.70           | 0.59                        | 0.42           | 1.00              | 0.93              | 0.97                              | 0.91                              |
| <b>2020 plots</b>             | 0.77           | 0.68                        | 0.58           | 0.93              | 1.00              | 0.91                              | 0.98                              |
| <b>2019 plots (Lexington)</b> | 0.59           | 0.50                        | 0.36           | 0.97              | 0.91              | 1.00                              | 0.90                              |
| <b>2020 plots (Lexington)</b> | 0.70           | 0.61                        | 0.52           | 0.91              | 0.98              | 0.90                              | 1.00                              |

SN—Scab Nursery, plots—Planting Dates Study Plots.

**Table S8.** Correlation coefficients of daily air temperature at anthesis and yield of hybrid and conventional rye varieties in Adairville, 2019.

|                     | <b>Max Air Temperature<br/>at Anthesis</b> | <b>Min Air Temperature<br/>at Anthesis</b> | <b>Max-Min Air<br/>Temperature at<br/>Anthesis</b> |
|---------------------|--------------------------------------------|--------------------------------------------|----------------------------------------------------|
| <b>Hybrid</b>       | 0.48                                       | 0.31                                       | 0.41                                               |
| <b>Conventional</b> | -0.01                                      | 0.01                                       | -0.02                                              |
